# Supplementary material for: Serotonin regulation of behavior via large-scale neuromodulation of serotonin receptor networks
Source: PubMed Central journal article supplement (PMC9829536; doi:10.1038/s41593-022-01213-3), 2022-12-15
Supplement: 41593_2022_1213_MOESM1_ESM.pdf [file 41593_2022_1213_MOESM1_ESM.pdf]

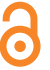

---

# Serotonin regulation of behavior via large-scale neuromodulation of serotonin receptor networks

---

In the format provided by the authors and unedited

---

## Supplementary Table 1.

### List of selected HCP-variables.

#### Cognition

Emotion\_Task\_Face\_Acc  
Gambling\_Task\_Reward\_Median\_RT\_Larger  
Gambling\_Task\_Punish\_Median\_RT\_Larger  
Flanker\_Unadj (inhibition)  
CardSort\_Unadj (flexibility)  
IWRD\_TOT (episodic memory, accuracy)  
IWRD\_RTC (episodic memory, reaction time correct responses)  
DDisc\_SV\_1mo\_200 (delay discount, \$200)  
DDisc\_SV\_6mo\_200  
DDisc\_SV\_1yr\_200  
DDisc\_SV\_3yr\_200  
DDisc\_SV\_5yr\_200  
DDisc\_SV\_10yr\_200  
DDisc\_SV\_1mo\_40K (delay discount, \$40k)  
DDisc\_SV\_6mo\_40K  
DDisc\_SV\_1yr\_40K  
DDisc\_SV\_3yr\_40K  
DDisc\_SV\_5yr\_40K  
DDisc\_SV\_10yr\_40K

#### Personality

NEOFAC\_A  
NEOFAC\_O  
NEOFAC\_C  
NEOFAC\_N  
NEOFAC\_E  
SSAGA\_Times\_Used\_Hallucinogens  
SSAGA\_Times\_Used\_Cocaine

#### Affect

LifeSatisf\_Unadj  
MeanPurp\_Unadj  
PosAffect\_Unadj  
AngAffect\_Unadj  
AngHostil\_Unadj  
AngAggr\_Unadj  
FearAffect\_Unadj  
Sadness\_Unadj  
SelfEff\_Unadj  
DSM\_Antis\_Raw  
DSM\_Depr\_Raw  
DSM\_Anxi\_Raw  
ASR\_Anxd\_Raw

#### Social behaviour

Friendship\_Unadj  
Loneliness\_Unadj  
PercHostil\_Unadj  
PercReject\_Unadj  
EmotSupp\_Unadj  
InstruSupp\_Unadj
