# Supplementary material for: Serotonin regulation of behavior via large-scale neuromodulation of serotonin receptor networks
Source: PubMed Central journal article supplement (PMC9829536; doi:10.1038/s41593-022-01213-3), 2022-12-15
Supplement: 41593_2022_1213_MOESM2_ESM.pdf [file 41593_2022_1213_MOESM2_ESM.pdf]

## Reporting Summary

Nature Portfolio wishes to improve the reproducibility of the work that we publish. This form provides structure for consistency and transparency in reporting. For further information on Nature Portfolio policies, see our [Editorial Policies](#) and the [Editorial Policy Checklist](#).

### Statistics

For all statistical analyses, confirm that the following items are present in the figure legend, table legend, main text, or Methods section.

n/a Confirmed

- The exact sample size ( $n$ ) for each experimental group/condition, given as a discrete number and unit of measurement
- A statement on whether measurements were taken from distinct samples or whether the same sample was measured repeatedly
- The statistical test(s) used AND whether they are one- or two-sided  
*Only common tests should be described solely by name; describe more complex techniques in the Methods section.*
- A description of all covariates tested
- A description of any assumptions or corrections, such as tests of normality and adjustment for multiple comparisons
- A full description of the statistical parameters including central tendency (e.g. means) or other basic estimates (e.g. regression coefficient) AND variation (e.g. standard deviation) or associated estimates of uncertainty (e.g. confidence intervals)
- For null hypothesis testing, the test statistic (e.g.  $F$ ,  $t$ ,  $r$ ) with confidence intervals, effect sizes, degrees of freedom and  $P$  value noted  
*Give  $P$  values as exact values whenever suitable.*
- For Bayesian analysis, information on the choice of priors and Markov chain Monte Carlo settings
- For hierarchical and complex designs, identification of the appropriate level for tests and full reporting of outcomes
- Estimates of effect sizes (e.g. Cohen's  $d$ , Pearson's  $r$ ), indicating how they were calculated

*Our web collection on [statistics for biologists](#) contains articles on many of the points above.*

### Software and code

Policy information about [availability of computer code](#)

Data collection

Data analysis https://fsl.fmrib.ox.ac.uk/fsl/fslwiki), MATLAB (v2020), MATLAB-based code from FSLNets (v0.6.3, <https://fsl.fmrib.ox.ac.uk/fsl/fslwiki/FSLNets>) and PermCCA (vApril2021, <https://github.com/andersonwinkler/PermCCA>).

For manuscripts utilizing custom algorithms or software that are central to the research but not yet described in published literature, software must be made available to editors and reviewers. We strongly encourage code deposition in a community repository (e.g. GitHub). See the Nature Portfolio [guidelines for submitting code & software](#) for further information.

### Data

Policy information about [availability of data](#)

All manuscripts must include a [data availability statement](#). This statement should provide the following information, where applicable:

- Accession codes, unique identifiers, or web links for publicly available datasets
- A description of any restrictions on data availability
- For clinical datasets or third party data, please ensure that the statement adheres to our [policy](#)

The data were collected by the Human Connectome Project, the Allen Brain Project, and by the authors of Grandjean et al., (NatComm) 2019. Mouse ofMRI raw data are publicly available (raw fMRI data: <https://openneuro.org/datasets/ds001541/versions/1.1.3>; preprocessed time-series: <http://dx.doi.org/10.34973/raa0-5z29>). Human fMRI and behavioural data are publicly available at <https://db.humanconnectome.org/>. Transcriptomic data for both the mouse and human brain are publicly available at <https://portal.brain-map.org/>.

## Field-specific reporting

Please select the one below that is the best fit for your research. If you are not sure, read the appropriate sections before making your selection.

Life sciences       Behavioural & social sciences       Ecological, evolutionary & environmental sciences

For a reference copy of the document with all sections, see [nature.com/documents/nr-reporting-summary-flat.pdf](https://www.nature.com/documents/nr-reporting-summary-flat.pdf)

## Behavioural & social sciences study design

All studies must disclose on these points even when the disclosure is negative.

|                   |                                                                                                                                                                                                                                                                                                                                                                                                                                                                                                                                                                                                                                                                                                                               |
|-------------------|-------------------------------------------------------------------------------------------------------------------------------------------------------------------------------------------------------------------------------------------------------------------------------------------------------------------------------------------------------------------------------------------------------------------------------------------------------------------------------------------------------------------------------------------------------------------------------------------------------------------------------------------------------------------------------------------------------------------------------|
| Study description | The study uses quantitative methods (human: quantitative cross-sectional, mouse: quantitative experimental).                                                                                                                                                                                                                                                                                                                                                                                                                                                                                                                                                                                                                  |
| Research sample   | The data from this study involved existing datasets.<br>Human: 812 individuals from the Human Connectome Project were used for the human study sample (aged 22–35 years, 410 females). The sample is representative of the young adult healthy US population. We chose this sample precisely for this reason and for the complete cognitive characterisation.<br>Mouse: we used data from Grandjean et al., 2019 (NatComm). We used data from the experiments with ofMRI manipulation of ePet-Cre mice expressing channelrhodopsin-2 (ChR2) in DRN serotonin neurons (N = 8, runs = 63), controls expressing eYFP only (N = 4, runs = 18), and those ePet-Cre mice treated with fluoxetine prior to ofMRI (N = 6, runs = 18). |
| Sampling strategy | We refer the reader to the publication Barch et al., 2014 (NeuroImage) for details on the sampling strategy of the Human Connectome Project.                                                                                                                                                                                                                                                                                                                                                                                                                                                                                                                                                                                  |
| Data collection   | Procedures for data collection in the Human Connectome Project are detailed in the publication Barch et al., 2014 (NeuroImage).                                                                                                                                                                                                                                                                                                                                                                                                                                                                                                                                                                                               |
| Timing            | Timing of data collection in the Human Connectome Project are detailed in the publication Barch et al., 2014 (NeuroImage).                                                                                                                                                                                                                                                                                                                                                                                                                                                                                                                                                                                                    |
| Data exclusions   | 812 individuals from the Human Connectome Project with complete rsfMRI data and non-imaging variable were used for the human study sample (aged 22–35 years, 410 females).                                                                                                                                                                                                                                                                                                                                                                                                                                                                                                                                                    |
| Non-participation | Please see Barch et al., 2014 (NeuroImage) for details on the human part of this study, and Grandjean et al., 2019 (NatComm) for details on the mouse part of this study.                                                                                                                                                                                                                                                                                                                                                                                                                                                                                                                                                     |
| Randomization     | Not relevant.                                                                                                                                                                                                                                                                                                                                                                                                                                                                                                                                                                                                                                                                                                                 |

## Reporting for specific materials, systems and methods

We require information from authors about some types of materials, experimental systems and methods used in many studies. Here, indicate whether each material, system or method listed is relevant to your study. If you are not sure if a list item applies to your research, read the appropriate section before selecting a response.

### Materials & experimental systems

| n/a                                 | Involved in the study                                           |
|-------------------------------------|-----------------------------------------------------------------|
| <input checked="" type="checkbox"/> | <input type="checkbox"/> Antibodies                             |
| <input checked="" type="checkbox"/> | <input type="checkbox"/> Eukaryotic cell lines                  |
| <input checked="" type="checkbox"/> | <input type="checkbox"/> Palaeontology and archaeology          |
| <input type="checkbox"/>            | <input checked="" type="checkbox"/> Animals and other organisms |
| <input type="checkbox"/>            | <input checked="" type="checkbox"/> Human research participants |
| <input checked="" type="checkbox"/> | <input type="checkbox"/> Clinical data                          |
| <input checked="" type="checkbox"/> | <input type="checkbox"/> Dual use research of concern           |

### Methods

| n/a                                 | Involved in the study                                      |
|-------------------------------------|------------------------------------------------------------|
| <input checked="" type="checkbox"/> | <input type="checkbox"/> ChIP-seq                          |
| <input checked="" type="checkbox"/> | <input type="checkbox"/> Flow cytometry                    |
| <input type="checkbox"/>            | <input checked="" type="checkbox"/> MRI-based neuroimaging |

## Animals and other organisms

Policy information about [studies involving animals](#); [ARRIVE guidelines](#) recommended for reporting animal research

|                         |                                                                                                       |
|-------------------------|-------------------------------------------------------------------------------------------------------|
| Laboratory animals      | B6.Cg-Tg(Fev-cre)1Esd/J (ePet-cre mice; RRID:IMSR_JAX:012712), male and female, 8 to 16 weeks of age. |
| Wild animals            | n/a                                                                                                   |
| Field-collected samples | n/a                                                                                                   |
| Ethics oversight        | Please see Grandjean et al., 2019 (NatComm) for the original statement on ethics oversight.           |

Note that full information on the approval of the study protocol must also be provided in the manuscript.

## Human research participants

Policy information about [studies involving human research participants](#)

|                            |                                                                                            |
|----------------------------|--------------------------------------------------------------------------------------------|
| Population characteristics | Please see Barch et al., 2014 (NeuroImage) for details.                                    |
| Recruitment                | Please see Barch et al., 2014 (NeuroImage) for details.                                    |
| Ethics oversight           | Please see Barch et al., 2014 (NeuroImage) for the original statement on ethics oversight. |

Note that full information on the approval of the study protocol must also be provided in the manuscript.

## Magnetic resonance imaging

### Experimental design

|                                 |                                                                                                                           |
|---------------------------------|---------------------------------------------------------------------------------------------------------------------------|
| Design type                     | Resting-state fMRI for humans. Block design for mice optogenetic-fMRI.                                                    |
| Design specifications           | Humans rs-fMRI: 4 runs of 1200 fMRI volumes.<br>Mouse ofMRI: 6 blocks per run spaced 40 seconds, 1 or 3 runs per session. |
| Behavioral performance measures | n/a                                                                                                                       |

### Acquisition

|                               |                                                                                                                                                                                                                                                                                                                                                                                                                                                           |
|-------------------------------|-----------------------------------------------------------------------------------------------------------------------------------------------------------------------------------------------------------------------------------------------------------------------------------------------------------------------------------------------------------------------------------------------------------------------------------------------------------|
| Imaging type(s)               | Functional, structural.                                                                                                                                                                                                                                                                                                                                                                                                                                   |
| Field strength                | Human MRI: 3T. Mouse MRI: 7T.                                                                                                                                                                                                                                                                                                                                                                                                                             |
| Sequence & imaging parameters | Human MRI: TR = 720 ms, echo time = 33.1 ms, multiband factor = 8, flip angle = 52 degrees, field of view = 208x180 mm (matrix = 104 x 90), 2x2x2 isotropic voxels with 72 slices, alternated LR/RL phase encoding.<br>Mouse MRI: multi-shot gradient echo EPI, field of view 20 x 17.5 mm, slice thickness 0.5 mm, slice gap 0.15 mm, 14 slices, 2 segments, TR 1000 ms. TE 5.6 ms, FA 90°, matrix 64 x 64, bandwidth 250000 Hz, 360 or 720 repetitions. |
| Area of acquisition           | Whole brain scan.                                                                                                                                                                                                                                                                                                                                                                                                                                         |
| Diffusion MRI                 | <input checked="" type="checkbox"/> Used <input type="checkbox"/> Not used                                                                                                                                                                                                                                                                                                                                                                                |
| Parameters                    | Human DW-MRI: The spatial resolution was 1.25 mm isotropic, TR was 5500 ms, TE was 89.50 ms, the b-values were 1000, 2000, and 3000 s/mm <sup>2</sup> , and the total number of diffusion sampling directions was 90, 90, and 90 for each of the shells, in addition to 6 b0 images.                                                                                                                                                                      |

### Preprocessing

|                            |                                                                                                                                                                                                                                                                                               |
|----------------------------|-----------------------------------------------------------------------------------------------------------------------------------------------------------------------------------------------------------------------------------------------------------------------------------------------|
| Preprocessing software     | We refer the reader to the original articles (and related reporting summaries) for a detailed description: human MRI preprocessing - Smith et al., 2015 (NatNeurosci); and human MRI preprocessing - Grandjean et al., 2019 (NatComm). A summary can be found in the article methods section. |
| Normalization              | We refer the reader to the original articles (and related reporting summaries) for a detailed description: human MRI preprocessing - Smith et al., 2015 (NatNeurosci); and human MRI preprocessing - Grandjean et al., 2019 (NatComm). A summary can be found in the article methods section. |
| Normalization template     | We refer the reader to the original articles (and related reporting summaries) for a detailed description: human MRI preprocessing - Smith et al., 2015 (NatNeurosci); and human MRI preprocessing - Grandjean et al., 2019 (NatComm). A summary can be found in the article methods section. |
| Noise and artifact removal | We refer the reader to the original articles (and related reporting summaries) for a detailed description: human MRI preprocessing - Smith et al., 2015 (NatNeurosci); and human MRI preprocessing - Grandjean et al., 2019 (NatComm). A summary can be found in the article methods section. |
| Volume censoring           | Scrubbing was not performed on any of these datasets.                                                                                                                                                                                                                                         |

### Statistical modeling & inference

|                         |                                                                                                                                                                                                                                                                                                                                                                                                                                                                                                                                                                             |
|-------------------------|-----------------------------------------------------------------------------------------------------------------------------------------------------------------------------------------------------------------------------------------------------------------------------------------------------------------------------------------------------------------------------------------------------------------------------------------------------------------------------------------------------------------------------------------------------------------------------|
| Model type and settings | Human: A brain-behaviour covariation was tested using canonical correlation analysis with permutation inference testing whilst respecting HCP family-structure using block-aware permutations.<br>Mouse: A difference in the response to photostimulation between wild-type mice vs. transgenic mice was tested via a general linear model with permutation inference testing. The effect of fluoxetine on mice response to photostimulation was tested via a general linear model with permutation inference testing whilst respecting subject-structure using block-aware |
|-------------------------|-----------------------------------------------------------------------------------------------------------------------------------------------------------------------------------------------------------------------------------------------------------------------------------------------------------------------------------------------------------------------------------------------------------------------------------------------------------------------------------------------------------------------------------------------------------------------------|

permutations.

## Effect(s) tested

Human: A brain-behaviour covariation was tested using canonical correlation analysis (CCA) with permutation inference testing whilst respecting HCP family-structure using block-aware permutations.

Mouse: A difference between wild-type mice vs. transgenic mice in the response to photostimulation was tested via a general linear model with permutation inference testing. The effect of fluoxetine on mice response to photostimulation was tested via a general linear model with permutation inference testing whilst respecting subject-structure using block-aware permutations.

Specify type of analysis:  Whole brain  ROI-based  Both

## Anatomical location(s)

Human:

Brain atlas: we used a novel atlas containing 152 cortical and subcortical regions, which was generated by merging the AAL cortical atlas with the 5-atlas subcortical, cerebellum, colin27 thalamus and striatum, hippocampus subfields, and amygdala atlases from CoBrALab.

Serotonin receptor networks (SRNs): HTR1A, HTR1E, HTR1F, HTR2A, HTR2C, HTR3B, HTR4, HTR5A, HTR7.

Mouse:

Brain atlas: the Allen Institute for Brain Science (AIBS) mouse brain atlas was resampled to 90 regions-of-interest by merging leafs (e.g., cortical layers) by branches (e.g., cortical area).

Serotonin receptor networks (SRNs): Htr1a, Htr1f, Htr1b, Htr2a, Htr2c, Htr3a, Htr3b, Htr4, Htr5b.

Statistic type for inference  
(See [Eklund et al. 2016](#))

Human: Non-parametric permutation testing with block-aware permutations.

Mouse: Non-parametric permutation testing with block-aware permutations and cluster correction.

## Correction

Human: Statistical significance was tested with 10,000 block-aware permutations respecting HCP family-structure and a family wise error (FWE)-correction was applied across all CCA modes.

Mouse: Statistical significance was tested with 1,000 block-aware permutations and FWE-correction. A one-dimensional (time) threshold-free cluster enhancement (TFCE) was applied when testing group differences on SRN temporal responses to optogenetic stimulation. P-values were FWE-corrected across time, network tested (SRNs), and two-tails inference.

## Models &amp; analysis

n/a | Involved in the study

  Functional and/or effective connectivity  Graph analysis  Multivariate modeling or predictive analysis

## Functional and/or effective connectivity

Functional connectivity metrics for SRNs were computed using FSL dual regression (<https://fsl.fmrib.ox.ac.uk/fsl/fslwiki/DualRegression>).

## Multivariate modeling and predictive analysis

Human: In order to avoid an overdetermined, rank-deficient CCA solution, and to limit the chances of overfitting, a dimensionality reduction step was performed prior to CCA using principal component analysis (PCA) whilst retaining >60% of variance (PCAs number identified via 'elbow' rule). In order to study whether significant modes of brain-behaviour covariation exist whilst adjusting for confounds of no interest, we used CCA as implemented in Winkler et al. (<https://github.com/andersonwinkler/PermCCA>).
